# Supplementary material for: Synthesis of N-doped graphene-functionalized Zn1.231Ge0.689N1.218O0.782solid solution as a photocatalyst for CO2reduction and oxidation of benzyl alcohol under visible-light irradiation
Source: Royal Society of Chemistry journal article supplement (doi:10.1039/c7ta02192e), 2017-01-01
Supplement: c7ta02192e1.pdf [file c7ta02192e1.pdf]

## Supporting Information

**Synthesis of N-doped graphene-functionalized  $\text{Zn}_{1.231}\text{Ge}_{0.689}\text{N}_{1.218}\text{O}_{0.782}$  solid solution and application as a photocatalyst for  $\text{CO}_2$  reduction and oxidation of benzyl alcohol under visible-light irradiation**

Jun Liang\*, Li Li,

College of Chemistry and Chemical Engineering, Ningxia University, Yinchuan 750021,  
China.

\*E-mail: junliang@nxu.edu.cn

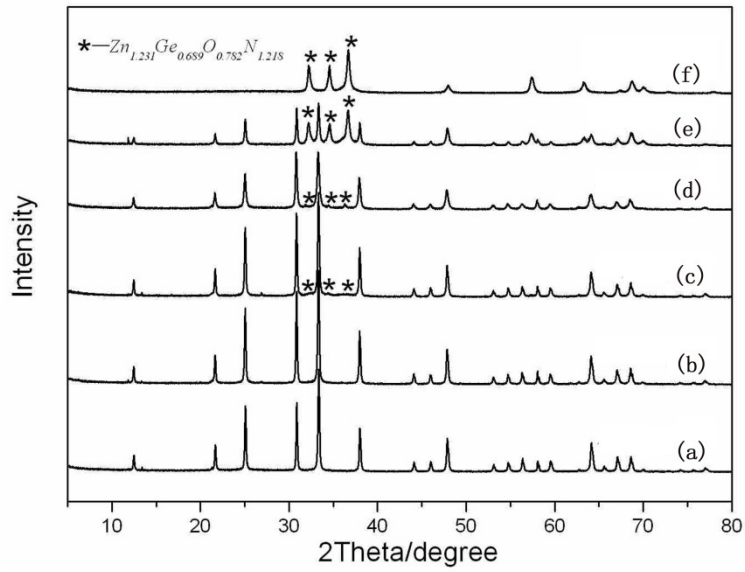

**Figure S1.** XRD patterns of the products obtained by nitridation of GO/Zn<sub>2</sub>GeO<sub>4</sub> composite for 1 h at different temperature of (a) 600 °C, (b) 650 °C (c) 700 °C, (d) 720 °C, (e) 750 °C, (f) 800 °C.

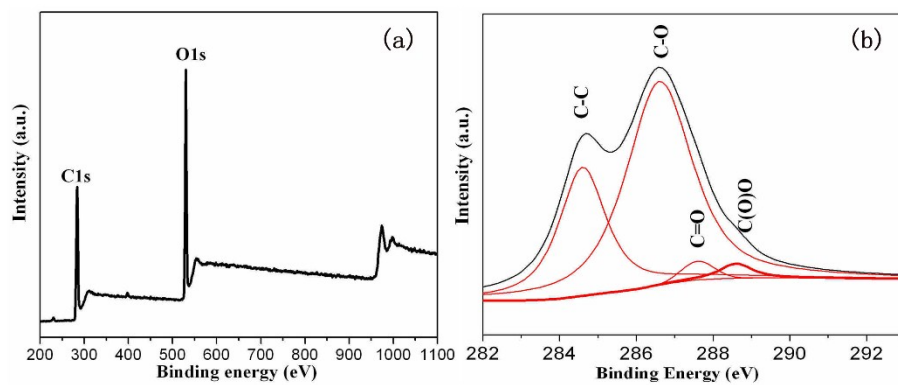

**Figure S2.** XPS spectra (a) and C1s (b) spectrum (b) of GO.

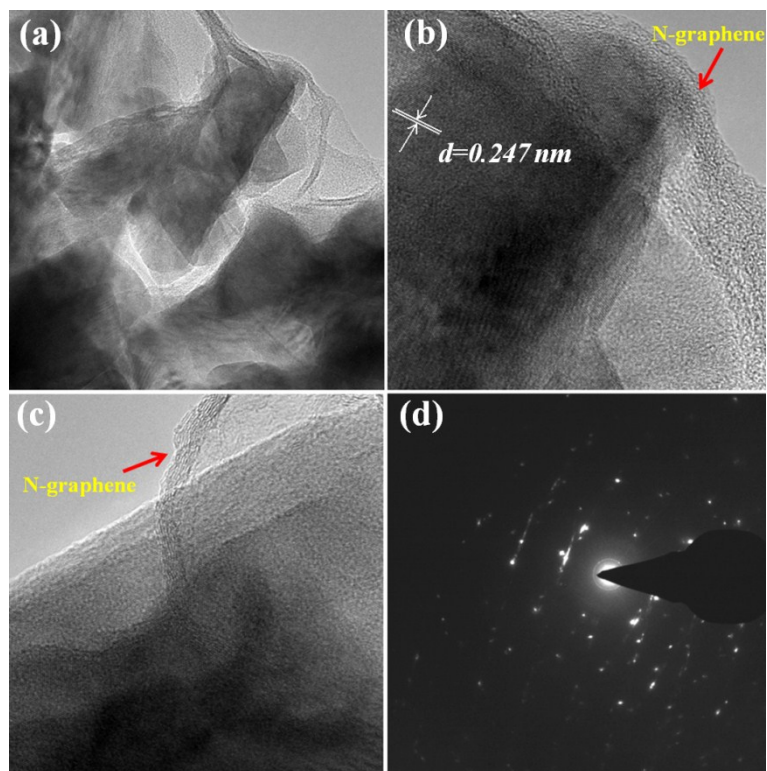

**Figure S3.** Typical TEM (a) and HRTEM (b, c) images of the (2.0 wt %) N-graphene/ZnGeON nanocomposite. The SAED pattern (d) of the (2.0 wt %) N-graphene/ZnGeON nanocomposite.

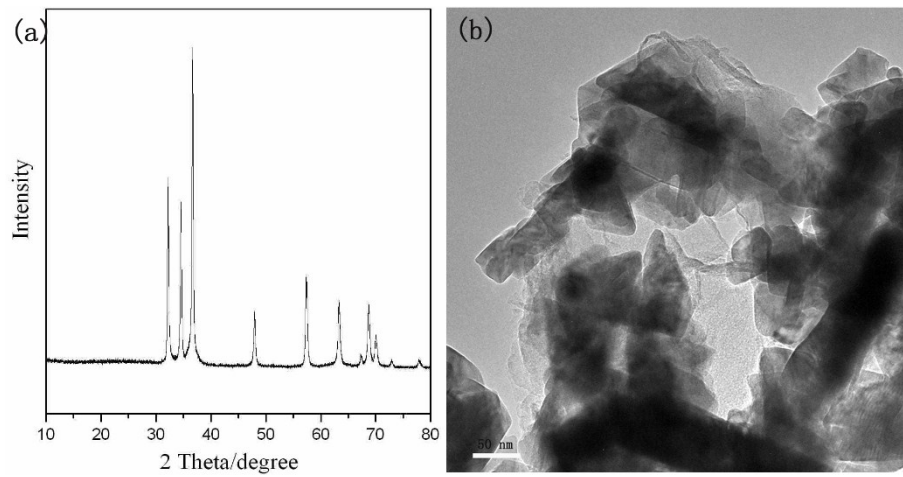

**Figure S4.** XRD pattern (a) and TEM image (b) of the as-obtained N-graphene/ZnGeON hybrid after the photocatalytic reaction.
